# Supplementary material
Source: MDPI journal article supplement (https://www.mdpi.com/2073-4344/11/9/1056)
Supplement: s1 [file s1]

# Process Intensification of the Propane Dehydrogenation considering Coke Formation, Catalyst Deactivation and Regeneration - Transient Modelling and Analysis of a Heat-integrated Membrane Reactor

Jan P. Walter <sup>1,\*</sup>, Andreas Brune <sup>1,2</sup>, Andreas Seidel-Morgenstern <sup>1,3</sup> and Christof Hamel <sup>1,2</sup>

<sup>1</sup> Otto von Guericke University Magdeburg, Institute of Process Engineering, Universitätsplatz 2, 39106 Magdeburg, Germany; andreas.brune@ovgu.de (A.B.); aseidel@ovgu.de (A.S.-M.); christof.hamel@hs-anhalt.de (C.H.)

<sup>2</sup> Anhalt University of Applied Sciences, Process Engineering, Bernburger Straße 55, 06354, Köthen, Germany

<sup>3</sup> Max Planck Institute for Dynamics of Complex Technical Systems, Sandtorstraße 1, 39106, Magdeburg, Germany

\* Correspondence: jan.walter@ovgu.de

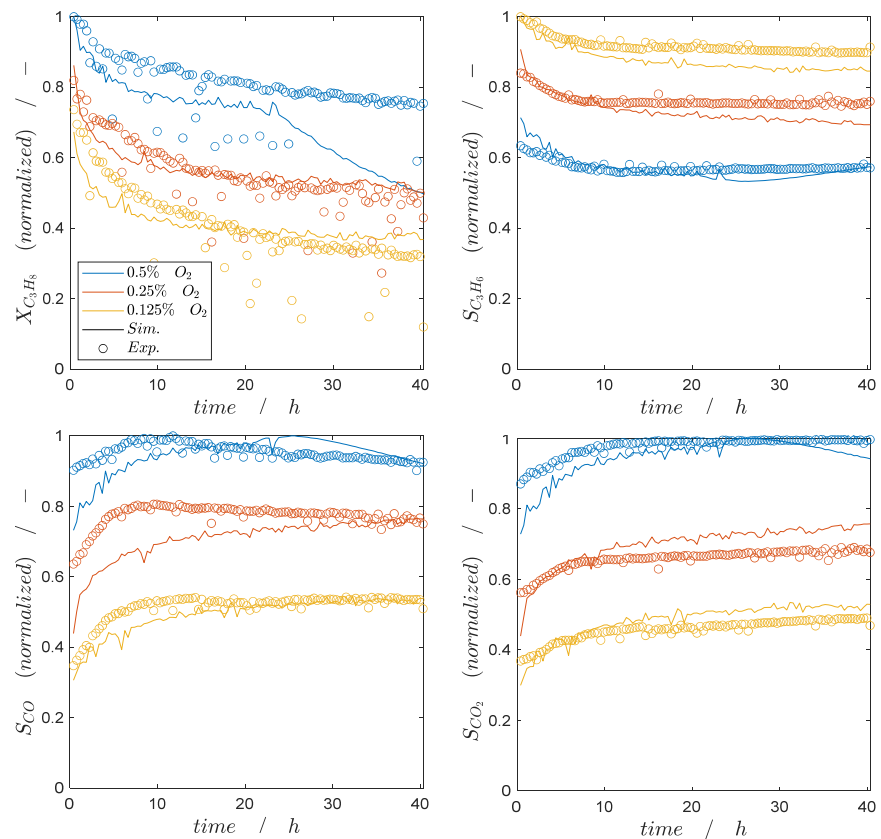

Figure S1. Normalized experimental data and model results.
